# Supplementary material
Source: HighWire-hosted journal article supplement (https://qdcxjkg.com/highwire/filestream/114472/field_highwire_adjunct_files/0/ERJ-01832-2014_Supplement.pdf)
Supplement: ERJ-01832-2014_Supplement.pdf [file ERJ-01832-2014_Supplement.pdf]

## Supplemental material

Preclinical validation and imaging of Wnt/beta-catenin-induced lung repair in human 3D lung tissue cultures

Franziska E. Uhl<sup>1</sup>, Sarah Vierkotten<sup>1</sup>, Darcy E. Wagner<sup>1</sup>, Gerald Burgstaller<sup>1</sup>, Rita Costa<sup>1</sup>, Ina Koch<sup>2</sup>, Michael Lindner<sup>2</sup>, Silke Meiners<sup>1</sup>, Oliver Eickelberg<sup>1</sup>, and Melanie Königshoff<sup>1</sup>

<sup>1</sup> Comprehensive Pneumology Center, Helmholtz Center Munich, Ludwig Maximilians University Munich, University Hospital Grosshadern, Member of the German Center for Lung Research (DZL), Munich, Germany

<sup>2</sup>Asklepios Clinics, Gauting, Germany

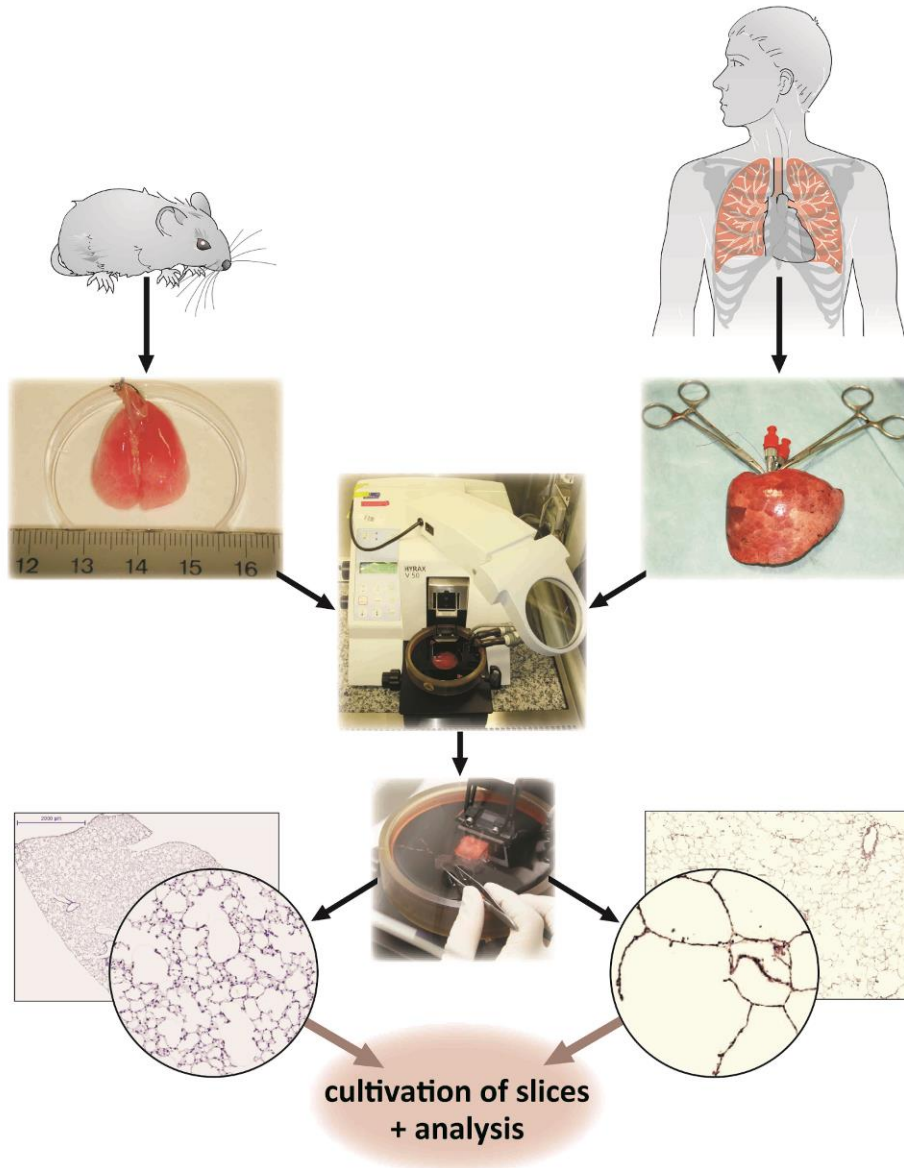

**Supplemental Figure 1:** Schematic overview of the generation of 3D *ex vivo* tissue cultures (3D-LTC) from murine and human samples. Lung tissue was filled with agarose and sliced with a vibratome to 300 (murine) or 500  $\mu\text{m}$  sections (human). A detailed protocol is provided in the Material and Methods section.

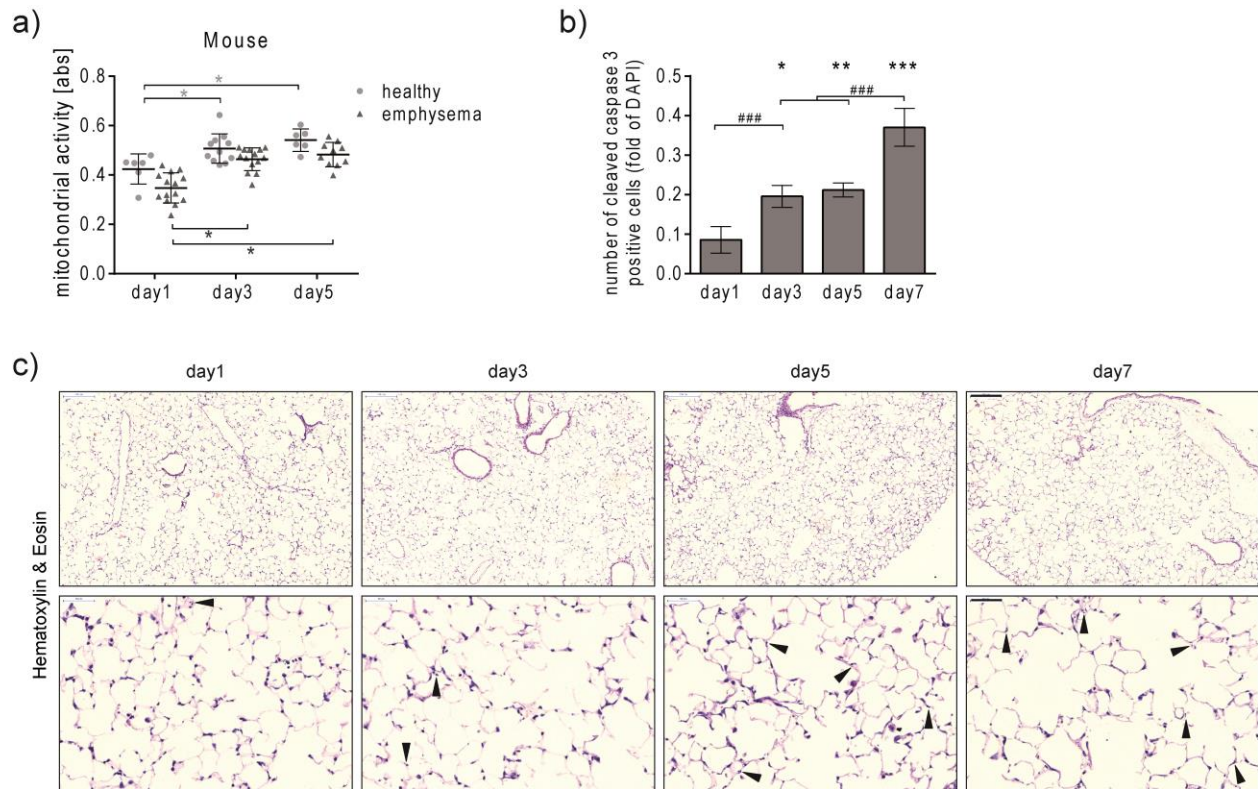

**Supplemental Figure 2:** Characterization of cell viability in 3D-LTC over culture time. a) WST-1 conversion of the cells in 3D-LTC from control and emphysematous C57Bl/6 mice cultivated for five days. n=6-14. \*: p<0.05. b) Quantification of the cleaved caspase 3 positive stained cells in 3D-LTC from healthy C57Bl/6 mice at different time points of cultivation. \*: significant to day1, #: significant to other time point, \*: p<0.05, \*\*: p<0.01, \*\*\*: p<0.001. c) H&E staining of 3D-LTC from healthy C57Bl/6 mice during cultivation. Black arrows show fragmented nuclei. Scale bars 200  $\mu$ m and 50  $\mu$ m.

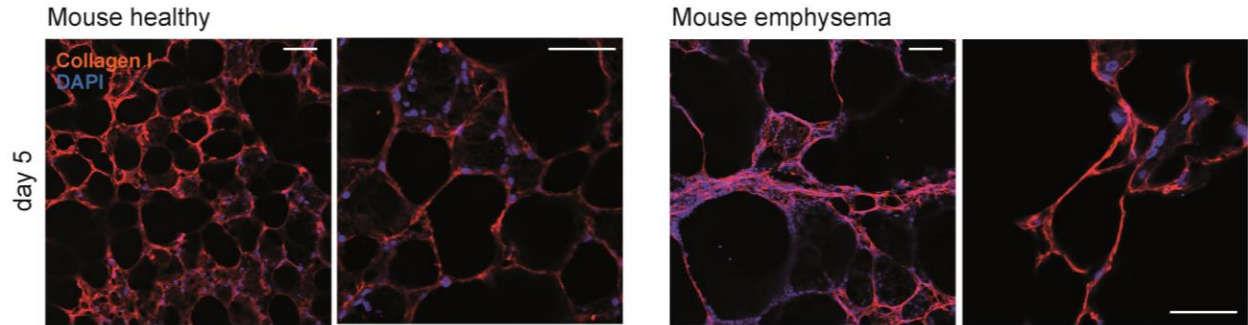

**Supplemental Figure 3:** Lung structure in murine 3D-LTC over culture time. Immunofluorescence staining of collagen I in 3D-LTC from healthy and emphysematous C57Bl/6 mice at day 5 of cultivation. Scale bars 50  $\mu\text{m}$ .

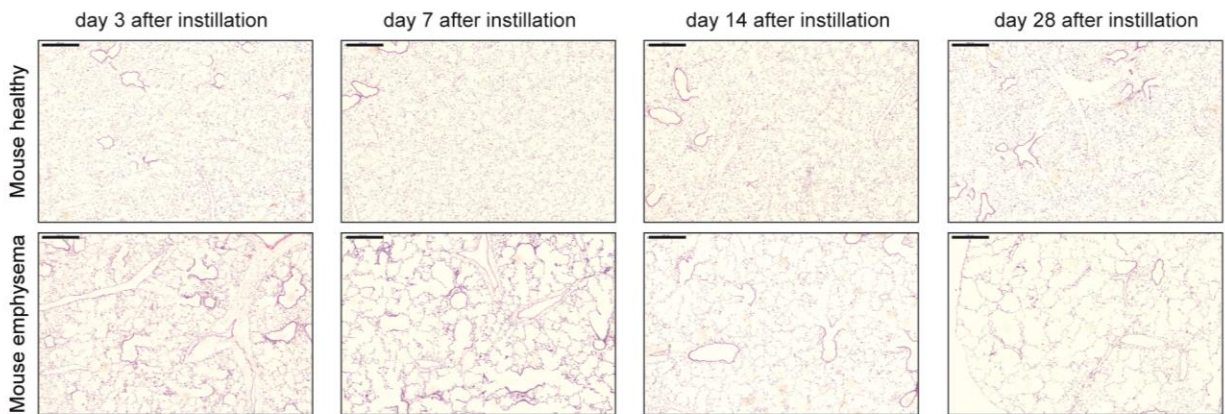

**Supplemental Figure 4:** Time course of elastase-induced emphysema. H&E staining of 3D-LTC at day 0 from healthy and emphysematous C57Bl/6 mice at different time points after elastase or PBS instillation. Scale bar 500  $\mu\text{m}$ .

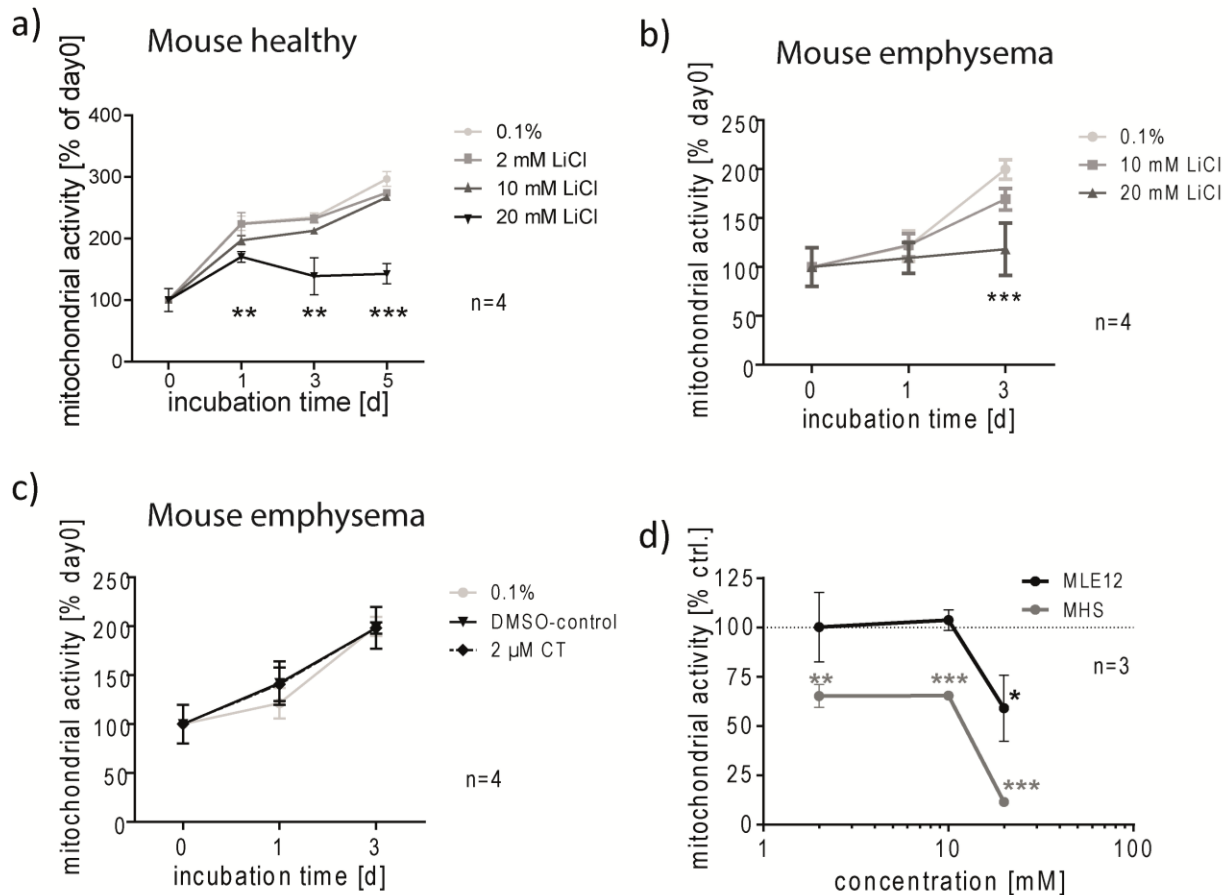

**Supplemental Figure 5:** Mitochondrial activity upon LiCl and CT treatment in 3D-LTC and 2D cell culture. WST-1 conversion of the cells in 3D-LTC from healthy (a) and emphysematous (b, c) C57Bl/6 mice treated with different concentrations of LiCl and CT for different periods. d) WST-1 conversion of the MLE12 epithelial cells and MHS macrophages treated with different concentrations of LiCl for 24 h compared to control (=100%). n=3-4. \*: p<0.05, \*\*: p<0.01, \*\*\*: p<0.001.

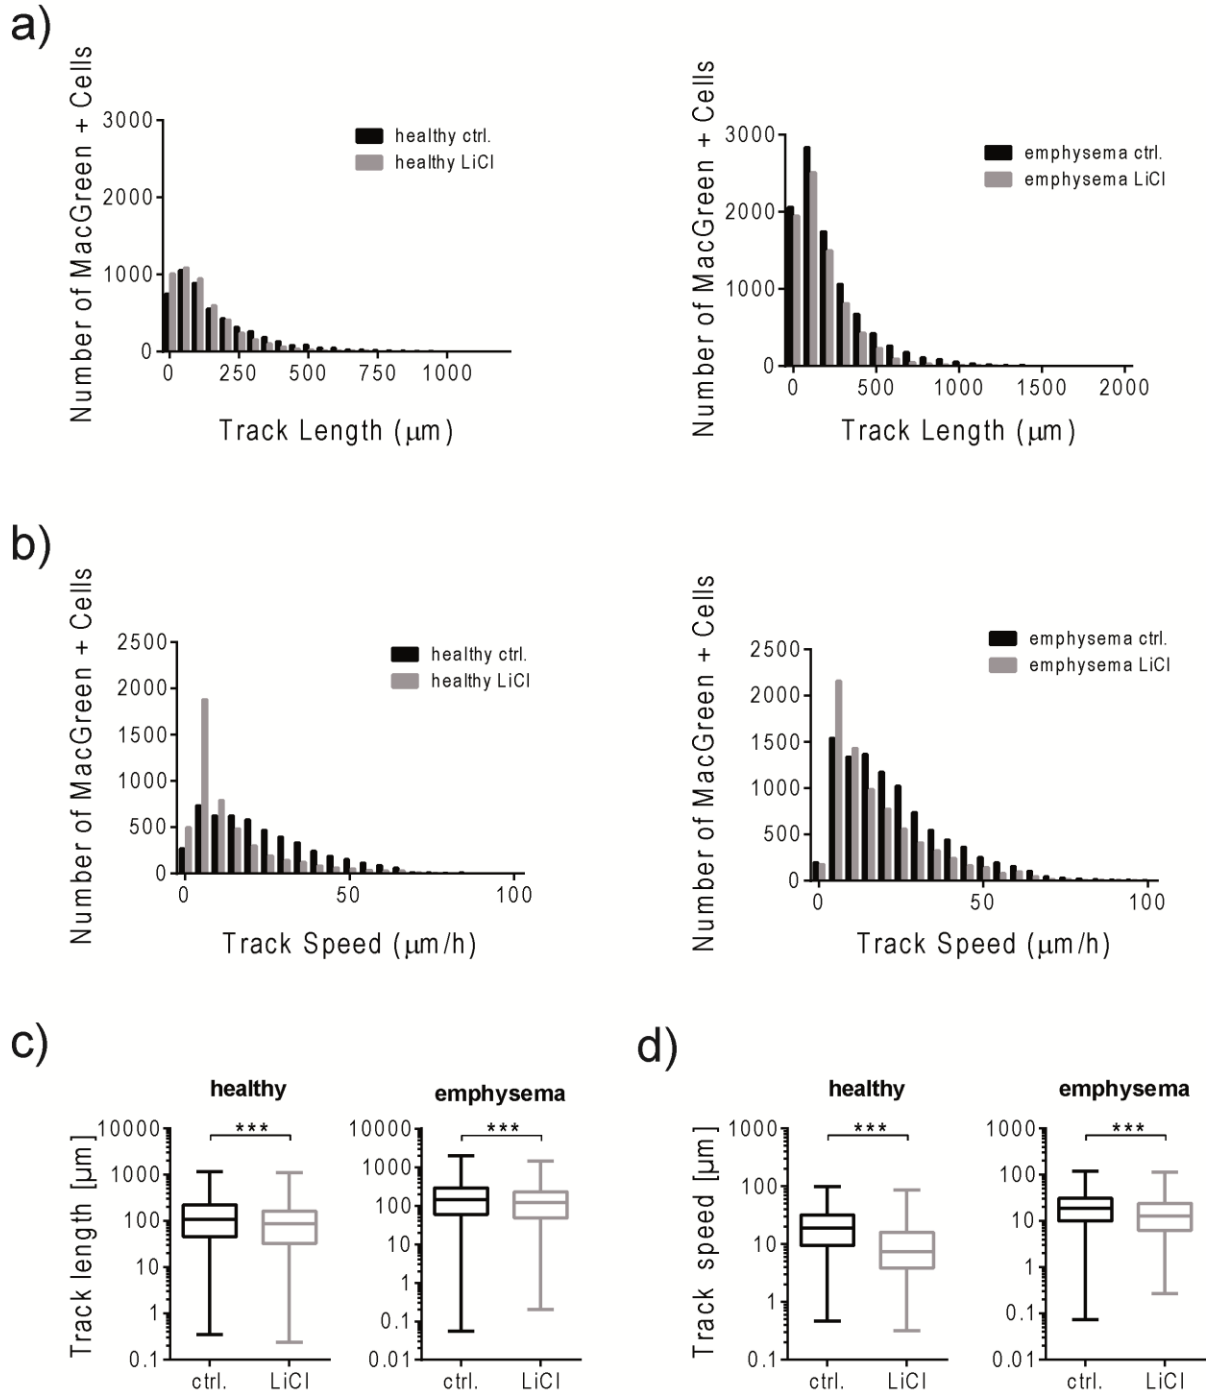

**Supplemental Figure 6:** Assessment of macrophage speed and length in healthy and emphysematous 3D-LTC by 4D confocal live tissue imaging. Quantification of track length (a) and track speed (b) of macrophages in 3D-LTC from healthy and emphysematous MacGreen animals with LiCl treatment for 48 h. Box plots of track length (c) and track speed (d). \*\*\*:  $p < 0.001$ . Quantification derived from Video 3.

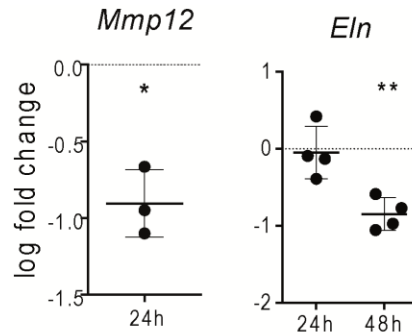

**Supplemental Figure 7:** *Mmp12* and *Eln* level upon Wnt/beta-catenin activation by 2  $\mu$ M CT in murine 3D-LTC. Gene expression analysis by qPCR in 3D-LTC from emphysematous C57Bl/6 mice treated with CT for different periods. n=3-4. \*: p<0.05, \*\*: p<0.01.

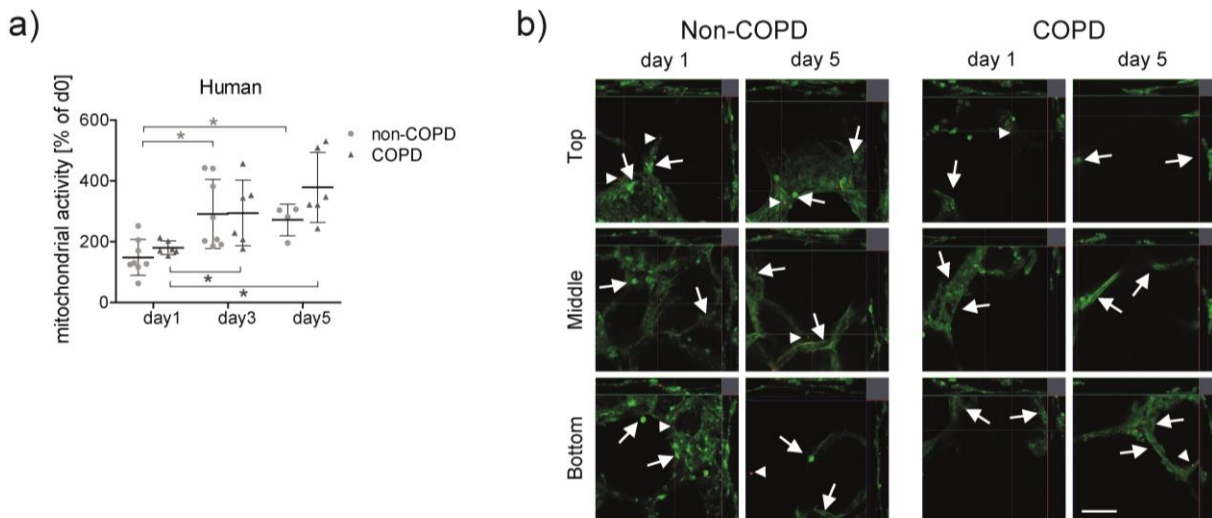

**Supplemental Figure 8:** Characterization of cell viability in human 3D-LTC over culture time. a) WST-1 conversion of the cells in 3D-LTC from non-COPD and COPD patients cultivated for five days. n=4-8. \*: p<0.05. b) Representative Live/Dead confocal images of the different planes of 3D-LTC from non-COPD and COPD patients at the indicated time points. Ortho views of the top, middle, and bottom plane. Healthy cells are indicated by green cytoplasm (arrows) and dead cells by red nucleus (arrowheads).

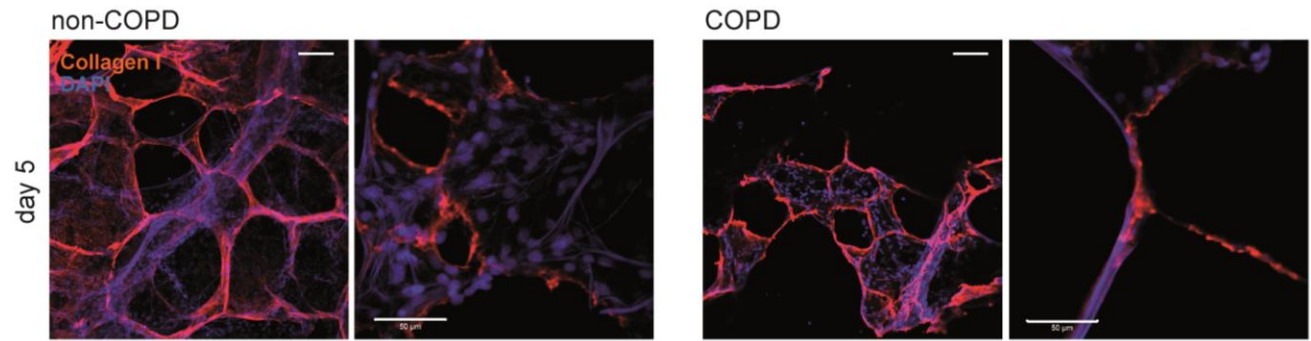

**Supplemental Figure 9:** Lung structure in patient-derived 3D-LTC over culture time. IF staining of collagen I of 3D-LTC from non-COPD and COPD patients at day 5 of cultivation. Scale bars 50 μm.



Supplemental Table 1. Clinical characteristics of patients included in this study

|                                               | <b>COPD</b>              | <b>Non-COPD</b>          |
|-----------------------------------------------|--------------------------|--------------------------|
|                                               | <b>(n = 11)</b>          | <b>(n = 14)</b>          |
| <b>Patient age at time of surgery (years)</b> | 66 ± 7.8                 | 62.1 ± 8.6               |
| <b>Gender (M:F)</b>                           | 7:4 (63.6%/36.4%)        | 7:7 (50%/50%)            |
| <b>Smoking status</b>                         |                          |                          |
| <b>Current smoker</b>                         | 8 (72.7%)                | 5 (35.7%)                |
| <b>Former smoker</b>                          | 2 (18.2%)                | 5 (35.7%)                |
| <b>Never</b>                                  | 0 (0%)                   | 2 (14.2%)                |
| <b>Unknown</b>                                | 1 (9.1%)                 | 2 (14.2%)                |
| <b>Physiology</b>                             |                          |                          |
| <b>%FEV<sub>1</sub></b>                       | 74.2 ± 13.6              | 107.1 ± 15.1             |
| <b>FEV<sub>1</sub>/FVC %</b>                  | 64.7 ± 5.6               | 80.1 ± 5.6               |
| <b>%DLCO/VA</b>                               | 63.7 ± 25.3 <sup>†</sup> | 74.2 ± 17.6 <sup>†</sup> |
| <b>COPD stage (GOLD Guidelines)</b>           |                          |                          |
| <b>I</b>                                      | 5 (45.5%)                |                          |
| <b>II</b>                                     | 6 (54.5%)                |                          |
| <b>Cancer type</b>                            |                          |                          |
| <b>Adenocarcinoma</b>                         | 5 (45.5%)                | 10 (71.4%)               |
| <b>Squamous cell carcinoma</b>                | 2 (18.2%)                | 3 (21.4%)                |
| <b>Other adenocarcinomas*</b>                 | 4 (36.4%)                | 1 (7.1%)                 |

Data are given as mean ± SD or as number of patients (%)

\* metastasis from organ other than the lung

† three unknown values

Supplemental Table 2. Human primers used for qPCR

| <b>Gene</b>   |    | <b>Sequence 5' - 3'</b>      |
|---------------|----|------------------------------|
| <i>ACTA2</i>  | fw | CGAGATCTCACTGACTACCTCATGA    |
|               | rv | AGAGCTACATAACACAGTTTCTCCTTGA |
| <i>AXIN2</i>  | fw | AGAAATGCATCGCAGTGTGAAG       |
|               | rv | GGTGGGTTCTCGGGAAATG          |
| <i>COL1A1</i> | fw | CAAGAGGAAGGCCAAGTCGAG        |
|               | rv | TTGTCGCAGACGCAGATCC          |
| <i>DKK2</i>   | fw | GATGTCACATATAAAAGGGCATGAAG   |
|               | rv | AATGACGAGCACAGCAAACC         |
| <i>HOPX</i>   | fw | GCCCCACAGAGGACCAGGTG         |
|               | rv | GCTTGGTTAAGCGGAGGAGAG        |
| <i>HPRT</i>   | fw | AAGGACCCACGAAGTGTTG          |
|               | rv | GGCTTTGTATTTTGCTTTTCCA       |
| <i>MMP12</i>  | fw | TGCTGATGACATACGTGGCA         |
|               | rv | AGGATTTGGCAAGCGTTGG          |
| <i>NKD1</i>   | fw | CACCCTGTATGACTTTGACAACAAC    |
|               | rv | CAGAGGAGTCCACCACCTCATAG      |
| <i>PDPN</i>   | fw | GAGAAAGATGGTTTGTCAACAGTG     |
|               | rv | GGCGTAACCCTTCAGCTCT          |
| <i>SFTPC</i>  | fw | GCCCAGTGCACCTGAAACGC         |
|               | rv | TCTCCAGAACCATCTCCGTGTGT      |

Supplemental Table 3. Murine primers used for qPCR

| <b>Gene</b>   | <b>Sequence 5' - 3'</b>       |
|---------------|-------------------------------|
| <i>Axin2</i>  | fw AGCAGAGGGACAGGAACCA        |
|               | rv CTGAACCGATTCATGACCAC       |
| <i>Col1a1</i> | fw AGCTTTGTGGATACGCGGACT      |
|               | rv TCGTACTGATCCCGATTGCA       |
| <i>Dkk2</i>   | fw GAGATCGCAACCATGGTCACT      |
|               | rv GGGTCTCCTTCATGTCCTTTTATATG |
| <i>Eln</i>    | fw GGCCTCTTGCTGATCCTCT        |
|               | rv ATAATAGACTCCACCGGGAAC      |
| <i>Fgfr2</i>  | fw ACACAGATAGCTCCGAAGACGTTGT  |
|               | rv CCCAGCCGGACAGCGGAAC        |
| <i>Fn</i>     | fw GGTGTAGCACAACCTTCCAATTACG  |
|               | rv GGAATTTCCGCCTCGAGTCT       |
| <i>Hopx</i>   | fw TCTCCATCCTTAGTCAGACGC      |
|               | rv GGGTGCTTGTTGACCTTGTT       |
| <i>Hprt</i>   | fw CCTAAGATGAGCGCAAGTTGAA     |
|               | rv CCACAGGACTAGAACACCTGCTAA   |
| <i>Mmp12</i>  | fw TGTACCCACCTACAGATACCTTA    |
|               | rv CCATAGAGGGACTGAATGTTACGT   |
| <i>Nkd1</i>   | fw TGTTCTCATCCACGCAATGG       |
|               | rv GAGCCCCACTCAGGTTCCA        |
| <i>Pdpr</i>   | fw ACAGGTGCTACTGGAGGGCTT      |
|               | rv TCCTCTAAGGGAGGCTTCGTC      |
| <i>Sftpc</i>  | fw AGCAAAGAGGTCCTGATGGA       |
|               | rv GAGCAGAGCCCCTACAATCA       |
| <i>Wnt2</i>   | fw AGCCCTGATGAACCTTCACAAC     |
|               | rv TGACACTTGCATTCTTGTTTCAAG   |

Supplemental Table 4. Antibodies for Western Blot

| <b>Name</b>              | <b>Source</b> | <b>Manufacturer</b>                   | <b>Order nr.</b> | <b>Dilution</b> | <b>Size [kDa]</b> |
|--------------------------|---------------|---------------------------------------|------------------|-----------------|-------------------|
| $\beta$ -actin           | Mouse         | Sigma-Aldrich; Taufkirchen<br>Germany | A3854            | 1:50,000        | 42                |
| $\beta$ -catenin, active | Mouse         | Millipore; Billerica, MA, USA         | 05-665           | 1:500           | 92                |
| Elastin                  | Mouse         | Millipore; Billerica, MA, USA         | MAB2503          | 1:1,000         | 68                |
| Hopx                     | Rabbit        | Santa Cruz; Santa Cruz, CA,<br>USA    | sc-30216         | 1:1,000         | 13                |
| Podoplanin               | Goat          | R&D; Minneapolis, MN, USA             | AF3244           | 1:1,000         | 40                |
| Podoplanin               | Rat           | Acris; Herford, Germany               | AM01133PU-N      | 1:1,000         | 37                |

Supplemental Table 5. Antibodies for immunofluorescence

| <b>Name</b>         | <b>Source</b> | <b>Manufacturer</b>                            | <b>Order nr.</b> | <b>Dilution</b> |
|---------------------|---------------|------------------------------------------------|------------------|-----------------|
| Aquaporin 5         | Rabbit        | Calbiochem, Millipore; Billerica, MA,<br>USA   | 178615           | 1:100           |
| CD45                | Rat           | BD; San Jose, CA, USA                          | 553076           | 1:500           |
| Cleaved<br>caspase3 | Rabbit        | Cell Signalling Technology; Boston,<br>MA, USA | 9661             | 1:250           |
| Collagen 1          | Rabbit        | Rockland; Gilbertsville, PA, USA               | 600-401-103      | 1:100           |
| E-cadherin          | Mouse         | BD; San Jose, CA, USA                          | 610181           | 1:100           |
| Podoplanin          | Goat          | R&D; Minneapolis, MN, USA                      | AF3244           | 1:100           |
| Podoplanin          | Rat           | Acris; Herford, Germany                        | AM01133PU-<br>N  | 1:100           |
| Sftpc, pro-         | Rabbit        | Abcam; Cambridge, UK                           | ab40879          | 1:500           |
| Sftpc, pro-         | Rabbit        | Millipore; Billerica, MA, USA                  | AB3786           | 1:500           |

## **Supplemental Videos**

Video 1: Ciliated cell of a murine 3D-LTC at day seven. Cilia are still beating, demonstrating cell viability and functionality.

Video 2: 4D confocal live tissue imaging of a 3D-LTC from an emphysematous TCF/LEF-GFP animal showing increases in GFP positive cells following 10 mM LiCl treatment.

Video 3: 4D confocal live tissue imaging of 3D-LTC from healthy MacGreen animals treated with ctrl. (left panel) or 10 mM LiCl (right panel) for 48 h showing subjective decreases in macrophage speed and distance travelled following LiCl treatment (quantitative characterization in Supplemental Figure 6).

Video 4: 4D confocal live tissue imaging of 3D-LTC from emphysematous MacGreen animals treated with ctrl. (left panel) or 10 mM LiCl (right panel) for 48 h showing subjective decreases in macrophage speed and distance travelled following LiCl treatment (quantitative characterization in Supplemental Figure 6).
